# Supplementary material for: Structural Dependence of Electronic Properties in A-A-D-A-A-Type Organic Solar Cell Material
Source: Hindawi journal article supplement (doi:10.1155/2015/708048), 2015-01-01
Supplement: f1 [file 708048.f1.pdf]

# Supporting Information for “Structural dependence of Electronic Properties in A-A-D-A-A-Type Organic Solar Cell Material”

Ram S. Bhatta\* and Mesfin Tsige\*

Department of Polymer Science, The University of Akron, Ohio 44325, United States

\*Corresponding authors: [rsb20@uakron.edu](mailto:rsb20@uakron.edu); [mtsige@uakron.edu](mailto:mtsige@uakron.edu)

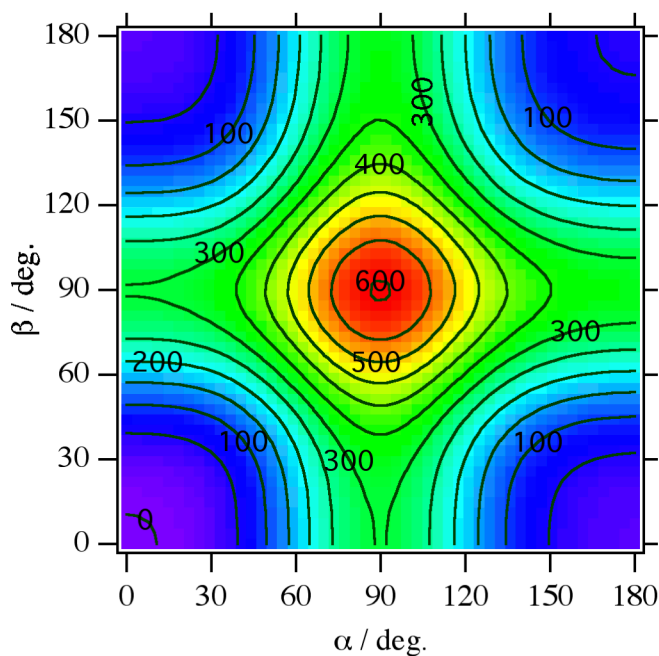

Figure S1: Contour plot of potential energy of BCNDTS molecule as a function of the two angles,  $\alpha$  and  $\beta$ .

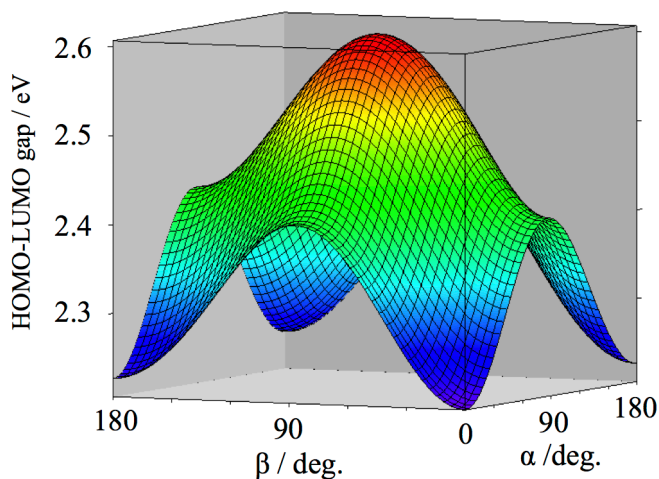

Figure S2: Two-dimensional HOMO-LUMO gap surface of BCNDTS molecule as a function of  $\alpha$  and  $\beta$ .
